# Supplementary material for: Association between type 2 diabetes and 5-year overall survival in early-stage pancreatic cancer: a retrospective cohort study
Source: PeerJ. 2022 Dec 12;10:e14538. doi: 10.7717/peerj.14538 (PMC9753753; doi:10.7717/peerj.14538)
Supplement: Supplemental Information 1 [file peerj-10-14538-s001.xlsx]

## Sheet: raw data
Age	BMI	Sex(1,male; 2,female)	Smoking history(0, no; 1, yes)	Drinking history(0, no; 1, yes)	Hypertension history(0, no; 1, yes)	Diabetes history(0, no; 1, yes)	Diabetes was diagnosed during admission(0, no; 1, yes)	Diabetes group(1, non diagnosed; 2, diagnosed)	Tumor location(1, pancreatic head and neck; 2, pancreatic body and tail)	Tumor differentiation(1, high-moderate; 2, poor)	Lympha metastasis(1, no; 2, yes)	Staging(AJCC 8th)	operation way（1, whipple; 2,distal; 3, others(toal, extended, unkown）)	fasting blood glucose（3.9-6.11mmol/L）	CA199（0-37U/mL）(1, normal; 2, high)	incident(1, death; 2, survival)	overall survial(months)	filter_$	Blood glucose control(1, unnormal; 2, normal)
67	19.5117	2	0	0	0	0	0	2	1	1	1	2	1		0	1	17.4667	1	1
52	23.9963	2	0	0	0	0	0	2	1	1	2	1	1	6.86	1	1	21.1	1	2
54	23.9963	2	0	0	1	1	1	1	1	1	1	2	2	10.22	1	1	37	1	2
56	23.9294	1	0	0	1	0	0	2	1	1	2	2	1	8.27	1	1	27.2667	1	2
55	20.2107	1	0	0	0	0	0	2	1	1		1	2	5.26	0	1	67.7333	0	1
73	23.4232	1	1	1	0	0	0	2	1	1	1	2	1	6.02	1	1	66.9667	0	1
42	24.5925	1	1	0	0	0	0	2	1	1	2	1	1	7.7	1	1	14.3667	1	2
57	22.9054	1	1	0	0	0	0	2	1	1	2	2	1	6.19	1	1	26.1	1	2
61	25.7512	1	0	0	0	0	0	2	1	1	2	1	1	5.61	0	2	107.067	0	1
64	21.2877	1	0	0	1	0	0	2	1	2	2	1	1	6.71	1	1	8.96667	1	2
69	23.8628	1	1	0	0	0	1	1	1	2	2	2	3	12.2	1	1	63.2333	0	2
53	32.124	2	0	0	1	1	0	1	1	1	1	2	1	9.16	1	1	13.8	1	2
61	21.4629	2	0	0	0	1	1	1	2	1	2	2	2	12.14	1	1	18.8	1	2
64	23.4141	2	0	0	0	1	0	1	1	1	1	2	1	10.17	0	1	86.1667	0	2
52	17.8528	1	1	0	0	0	0	2	2	1	2	2	2	7.76	0	1	11.4667	1	2
61	24.0345	1	1	1	0	0	0	2	1	1	2	1	1	7.88	1	1	8.93333	1	2
72	25.1234	1	0	1	0	1	0	1	1	1	2	1	1	8.87	1	1	24.3	1	2
55	23.5791	1	1	1	0	0	0	2	1	1	2	1	1	5	1	1	60.8	0	1
66	19.5709	1	0	0	0	0	0	2	1	1	2	1	1	7.24	1	1	8.5	1	2
73	24.0909	1	0	0	0	0	0	2	1	1	2	1	1	6.3	1	1	11.1667	1	2
66	19.9143	1	1	1	0	0	0	2	1	1	1	2	1	5.06	1	1	7.43333	1	1
67	28.0969	2	0	0	0	0	0	2	1	1	2	2	1	11.81	1	1	54.4	1	2
69	26.4379	1	0	1	1	0	0	2	1	1	2	1	1	6.47	1	1	45.1333	1	2
66	21.0727	2	0	0	1	0	0	2	1	1	1	2	1	5.74	1	1	35.9333	1	1
57	22.0611	2	1	1	1	0	0	2	2	2	2	1	1	5.74	0	1	4.8	1	1
66	23.0044	1	0	0	0	1	1	1	1	1	2	1	1	11.32	1	1	9.43333	1	2
65	20.601	1	0	0	0	0	0	2	2	1	2	1	2	5.2	1	1	7.86667	1	1
66	29.2676	2	0	0	0	0	0	2	1	1	2	2	1	6.12	1	1	47.6	1	2
37	27.9017	1	1	1	0	0	0	2	1	1	2	1	1	5.67	0	1	29.7333	1	1
52	20.1259	2	0	0	0	0	0	2	2	1	2	2	2	5.57	1	1	15.1	1	1
57	17.8037	2	0	0	0	0	0	2	1	2		1	1	5.19	0	1	2.26667	1	1
58	19.2001	1	0	0	0	0	0	2	1	1	2	2	1	5.49	1	1	4.16667	1	1
77	18.9286	1	1	1	0	0	0	2	1	1	1	2	1	6	1	1	4.73333	1	1
66	20.601	1	1	0	0	0	0	2	1	1	1	2	1	4.96	1	1	11.1333	1	1
38	28.2338	1	0	0	0	0	0	2	1	2	2	1	1	6.66	1	1	2.06667	1	2
70	22.3163	2	0	0	0	0	1	1	2	1	2	1	1	7.21	0	1	58.2667	1	2
67	25.3653	2	1	0	0	1	0	1	1	1	2	1	1		0	2	98.9667	0	1
58	21.6741	2	1	1	0	0	0	2	1	1	2	2	1	7.56	1	1	17.7	1	2
57	21.287	2	0	0	0	0	0	2	1	1	2	1	1	8.31	1	1	6.3	1	2
68	18.8842	1	1	0	0	0	0	2	1	1		1	1	4.35	0	1	7.06667	1	1
69		2	0	0	1	0	0	2	1	1	2	2	1	7.82	1	1	5.26667	1	2
71	24.0909	1	0	0	1	0	0	2	1	1	1	2	1	5.88	1	1	9.13333	1	1
64	23.8971	1	1	1	0	1	1	1	1	1	2	1	1	9.39	0	1	8.33333	1	2
58	22.9054	1	1	1	0	0	0	2	2	1		1	2	6.66	0	1	15.7333	1	2
68	21.4629	2	0	0	0	0	0	2	1	1	2	2	1	11.17	0	1	53.9333	1	2
61	17.9508	2	0	0	0	0	0	2	1	1	1	2	1	6.19	1	1	0.0666667	1	2
57	27.0926	2	0	0	0	0	0	2	1	1	2	1	1	7	0	1	27.5667	1	2
67	24.7212	1	1	1	0	1	0	1	1	1	2	1	1	5.35	1	1	51.6	1	1
50	19.7054	1	0	0	0	1	1	1	1	1	2	1	1	5.89	0	1	71.9667	0	1
72	27.5325	1	0	0	0	0	0	2	1	1	2	1	1	6.21	0	1	21.2667	1	2
67	19.5117	2	0	0	0	1	0	1	1	1	2	1	1	10.69	0	1	13.2333	1	2
67	24.975	2	0	0	1	0	0	2	1	1	2	1	1	8.41	0	2	92.2	0	2
52	28.6407	2	0	0	1	0	0	2	1	1	1	2	1	5.65	1	1	48.3333	1	1
67	21.2877	1	1	0	1	1	0	1	1	1	2	2	1	9.24	1	1	1.86667	1	2
49	23.5819	1	1	1	1	1	0	1	1	1	2	2	1	6.53	1	1	35.8667	1	2
77	25.8117	1	1	0	0	0	0	2	1	1	1	2	1		0	1	39.1333	1	1
49	23.5819	1	1	1	1	1	0	1	1	1	2	2	1	13.11	1	1	11.2333	1	2
67	22.3177	1	0	0	0	1	0	1	1	1	2	1	1	10.47	1	1	8.23333	1	2
73	24.3089	2	0	0	0	1	0	1	1	1	2	1	1		1	1	6	1	1
76	20.9935	1	0	0	0	0	0	2	1	1	2	1	1	4.2	0	1	0.966667	1	1
49	22.3174	2	0	0	0	0	0	2	1	1	2	2	1	5.99	1	1	47.2	1	1
60	26.9262	2	0	0	0	1	0	1	2	2	2	1	2	10.21	1	1	4.36667	1	2
45	28.2982	1	1	0	0	0	0	2	2	1	2	2	2	6.44	0	1	10.5667	1	2
46	23.8566	2	0	0	0	1	0	1	1	2	2	1	1	11.36	0	1	12.3667	1	2
49	28.6351	1	1	1	1	0	0	2	1	1	2	1	1	7.62	1	1	29.7667	1	2
72	28.9091	1	0	0	1	0	0	2	1	1	2	1	1	8.46	1	1	0.5	1	2
67	18.7313	2	0	0	0	0	0	2	2	1	2	1	2	6.07	0	1	29.3667	1	1
58	32.124	2	0	0	1	0	0	2	2	2	2	2	2	8.77	1	1	11.8	1	2
83	22.956	1	0	0	1	1	0	1	1	2	2	2	1	6.33	1	1	45.2667	1	2
55	20.2107	1	0	0	0	0	0	2	1	1	2	2	1	13.81	1	1	8.3	1	2
71	27.0984	2	0	0	1	0	0	2	1	1	1	2	1	10.33	1	1	0.233333	1	2
51	22.2317	1	0	0	0	0	0	2	1	2	1	2	1	6.74	1	1	6.33333	1	2
69	20.601	1	1	0	0	0	0	2	1	1	1	2	1	5.32	1	1	7.96667	1	1
42	19.2392	2	0	0	0	0	0	2	1	1	2	1	1	6.32	1	1	24.5667	1	2
65	25.7512	1	1	0	1	0	0	2	2	2	2	2	2	6.04	0	1	41.1333	1	1
64	25.3653	2	1	0	1	0	0	2	1	1	1	2	1	5.4	1	1	43.1333	1	1
54	19.3686	1	0	0	0	0	0	2	2	1	2	1	2	4.64	0	1	30.2667	1	1
50	24.2528	1	0	0	0	1	0	1	2	2	2	2	2	13.82	1	1	6.46667	1	2
63	23.4141	2	0	0	1	1	1	1	2	1	2	1	1	5.28	0	1	11.3333	1	1
71	27.5325	1	1	0	0	0	0	2	1	2	2	1	1	5.91	1	1	13.1	1	1
44	25.2663	1	1	0	0	1	0	1	1	1	1	2	1	13.26	1	1	20.9	1	2
69	21.631	1	1	1	0	0	1	1	1	1	2	1	1	5.46	0	1	16.9333	1	1
49	25.6032	1	0	0	0	0	0	2	1	2	2	1	1	5.05	0	2	83.7	0	1
61	20.601	1	1	1	0	0	1	1	1	2	2	2	1	6.06	1	1	4.06667	1	1
55	24.3833	2	0	0	1	0	0	2	1	1	2	1	1	6.61	1	2	83.4	0	2
60	24.7212	1	0	0	1	0	0	2	2	1	1	2	2	7.13	1	1	4.2	1	2
76	24.7074	2	0	0	1	0	0	2	1	2	2	2	1	7.28	1	1	4.43333	1	2
53	21.6741	2	0	0	0	0	0	2	1	1	2	2	1	6.74	1	1	7.53333	1	2
64	21.2877	1	0	0	0	0	0	2	1	1	2	1	1	6.06	1	1	39.5333	1	1
76	21.5193	2	0	0	0	1	0	1	1	2	2	1	1	10.41	1	1	19.9333	1	2
68	23.8971	1	0	0	0	1	0	1	1	1	2	2	1	13.88	1	1	0.633333	1	2
64	20.2576	1	1	1	0	0	0	2	1	1	2	2	1	6.73	0	1	20.5333	1	2
47	28.972	1	1	1	1	0	0	2	1	1	2	1	1	5.97	1	1	35.7333	1	1
59	23.5791	1	1	1	0	0	0	2	1	2	2	1	1	5.62	1	1	3.9	1	1
63	20.601	1	1	1	1	0	0	2	1	2	2	1	1	6.2	0	1	4.66667	1	2
65	15.6094	2	0	0	0	1	0	1	1	1	2	1	1	6.28	0	2	79.8333	0	2
39	21.9227	1	0	0	0	0	0	2	1	1	1	2	2	5.23	1	1	34.2333	1	1
65	24.1945	2	1	0	0	0	0	2	1	1	2	1	1	5.3	1	1	0.466667	1	1
48	24.5925	1	1	1	0	0	0	2	1	1	2	2	1	6.96	1	1	14.4	1	2
69	22.3177	1	1	0	0	0	0	2	1	1	2	2	1	5.35	0	1	23.0333	1	1
65	19.902	2	0	0	0	0	1	1	1	1	2	1	1	7.36	1	1	21.7	1	2
69	21.4629	2	0	0	0	1	0	1	1	1	2	1	1	11.12	1	1	11.4667	1	2
59	23.9963	2	0	0	0	0	0	2	1	1	1	2	1	5.42	1	1	28.4333	1	1
51	21.287	2	0	0	0	0	0	2	1	2	2	1	1	6.6	1	1	13.5667	1	2
63	19.7426	1	1	1	1	1	0	1	2	1	2	2	2	7.43	1	1	36.8	1	2
44	26.9348	2	0	0	0	0	0	2	1	1	2	1	1	6.64	1	1	20.3	1	2
64	22.6611	1	1	0	0	0	0	2	1	1	2	1	1	5.52	1	1	23.0667	1	1
63	19.1215	2	1	0	0	0	0	2	1	1	2	1	1	7.82	0	1	49.5	1	2
59	24.9265	1	1	1	1	1	0	1	2	1	2	1	2	7.94	1	1	13.2	1	2
61	21.0727	2	0	0	0	1	0	1	1	1	2	1	1	7.99	0	1	32.6333	1	2
61	24.1945	2	0	0	1	0	0	2	2	1	2	1	2	6.38	1	1	19.1333	1	2
62	25.4079	1	1	1	0	0	0	2	1	1	2	1	1	5.99	1	1	40.4	1	1
64	25.3653	2	0	0	0	0	1	1	1	1	2	1	1	10.25	1	1	42.7	1	2
72	19.961	1	0	0	0	0	0	2	1	1	2	1	1	14.12	1	1	37.4333	1	2
57	21.2212	1	1	0	0	0	0	2	1	1	1	2	1	9.2	0	1	31.4	1	2
58	26.2739	1	1	0	1	0	1	1	1	2	2	2	1	7.24	0	1	4.73333	1	2
48	25.0109	2	0	0	0	0	0	2	2	1	1	2	2	4.65	1	1	22.1333	1	1
57	23.6092	2	0	0	0	1	0	1	1	1	2	1	1	9.09	1	1	10.3667	1	2
44	14.1491	1	1	1	0	1	0	1	1	1	1	2	1	5.86	0	1	10.4	1	1
61	23.0044	1	1	0	1	1	0	1	1	1	2	1	1	7.39	0	1	9.8	1	2
57	28.2949	1	0	1	1	1	0	1	1	2	2	2	1	11.84	1	1	6.9	1	2
70	22.7148	2	0	0	0	0	0	2	1	1	2	1	1	8.42	1	1	16.7333	1	2
67	24.0345	1	0	0	0	0	0	2	1	1	2	2	1	6.46	1	1	48.5	1	2
78	23.9104	2	1	0	0	1	0	1	1	1	2	1	3	8.83	1	1	24.3333	1	2
59	25.5444	2	1	1	0	1	0	1	1	1	1	1	3	14.15	1	1	1.5	1	2
72	23.9104	2	0	0	0	0	0	2	1	1	2	2	1	5.04	1	1	7.13333	1	1
53	27.6212	1	1	0	0	0	0	2	1	2	1	2	1	5.11	1	1	2.86667	1	1
73	22.7143	1	1	0	0	1	0	1	2	1	2	1	2	14.2	1	1	9.53333	1	2
63	22.3177	1	0	0	0	0	0	2	1	2	1	2	1	5.77	0	1	29.9	1	1
59	23.5791	1	1	0	1	1	0	1	1	2		2	1	15.99	1	2	73	0	2
71	23.5119	2	0	0	1	1	0	1	1	1	2	2	1	11.63	1	2	72.9667	0	2
63	24.7212	1	0	0	1	1	1	1	1	1	2	1	1	12.04	1	1	6.23333	1	2
62	17.5108	1	1	1	0	0	0	2	1	1	2	1	1	10.06	1	1	8.56667	1	2
43	28.6351	1	1	1	0	0	0	2	1	1	2	1	1	6.31	0	2	72.3667	0	2
66	25.4079	1	1	0	0	0	0	2	2	2	2	2	2	6.71	0	1	9.3	1	2
67	25.3444	1	0	0	1	0	0	2	1	1	2	1	1	5.27	0	1	9.13333	1	1
62	24.0345	1	1	1	0	0	0	2	1	1	2	1	1	5.44	1	1	19.4	1	1
64	17.8542	1	0	0	0	0	0	2	2	2		1	2	8.76	1	1	4.4	1	2
60	23.0044	1	0	0	0	0	0	2	1	1	2	1	1		0	2	71.6	0	1
39	21.8134	2	0	0	0	0	0	2	1	2		2	1	6.56	1	1	6.06667	1	2
54	23.5791	1	0	1	1	1	0	1	2	1	2	1	1		1	1	2.93333	1	1
58	12.3852	2	1	0	0	0	0	2	1	1	2	1	1	9.71	1	1	5.8	1	2
60	23.8971	1	0	0	0	1	0	1	1	1	2	2	1		0	1	16.9667	1	1
60	23.2423	1	1	0	0	0	0	2	1	1		1	1	6.06	0	1	47.8667	1	1
65	17.9508	2	0	0	0	0	0	2	2	1	2	2	2	6.59	1	1	9.73333	1	2
67	23.0044	1	1	1	0	0	0	2	2	1	2	1	2	6.68	0	1	48.2333	1	2
43	25.2663	1	1	0	0	0	0	2	1	1	2	1	1	6.59	1	1	15.5667	1	2
60	22.3177	1	1	0	0	0	0	2	1	1	2	1	1	5.56	1	2	67.7	0	1
59	20.5129	2	0	0	0	0	0	2	1	1	2	1	1	6.78	1	1	24.7333	1	2
52	20.8844	1	0	0	0	1	0	1	1	1	2	1	1	15.1	0	1	9.16667	1	2
63	23.0238	2	0	0	1	1	0	1	1	1	2	1	3	11.33	1	1	15.0333	1	2
59	23.5791	1	0	0	0	0	0	2	1	2	2	1	1	5.9	1	1	21.6667	1	1
64	27.468	1	1	1	1	1	0	1	1	1	2	2	1	6.23	1	1	8.86667	1	2
52	26.9476	1	0	0	0	1	0	1	1	1	1	2	1	16.05	1	2	67.2333	0	2
58	22.0611	2	0	0	1	1	0	1	1	2	1	2	1	11.93	1	1	8.8	1	2
78	21.1208	2	0	0	1	0	0	2	1	2	1	2	1	6.14	1	1	5.53333	1	2
55	21.2212	1	1	0	1	1	0	1	1	2	2	1	1	6.2	1	1	16.8333	1	2
55	24.2528	1	0	1	1	1	0	1	1	1	1	2	1	8.79	0	1	22.6	1	2
50	21.287	2	0	0	0	0	0	2	1	1	2	1	1	5.66	0	1	16.1333	1	1
72	25.9029	2	0	0	1	0	0	2	1	1		1	1	6.51	0	1	40.2333	1	2
57	23.9294	1	0	0	0	0	0	2	1	2	1	2	3		0	1	39.2	1	1
66	25.7512	1	1	1	1	0	0	2	1	1	2	1	1	5.14	1	1	14.8667	1	1
63	23.0044	1	1	0	0	0	1	1	1	1	2	1	1	12.58	1	1	11.3667	1	2
65	25.2362	1	1	0	1	0	0	2	1	1	2	1	1	5.52	1	1	20.6667	1	1
53	20.8844	1	0	0	0	0	0	2	1	1		1	1	5.52	1	1	7.7	1	1
65	17.9508	2	0	0	0	0	0	2	1	1	1	2	1	6.4	0	1	7.46667	1	2
47	23.087	2	0	0	0	0	0	2	1	2	2	1	1	7.9	0	1	9.33333	1	2
54	21.8949	1	0	0	0	0	0	2	2	1	2	1	2	5.1	1	1	33.5667	1	1
59	19.3518	2	0	0	0	0	0	2	1	1	2	1	1	7.29	1	2	57.1	1	2
74	23.4026	1	1	0	0	0	0	2	2	2		1	2	5.58	1	1	9.53333	1	1
71	18.3313	2	0	0	0	1	1	1	2	1	2	2	2	8.93	1	1	5.7	1	2
57	29.0277	2	0	0	1	0	0	2	1	1	2	2	1		0	1	10.4	1	1
53	20.1259	2	0	0	0	0	0	2	1	1	2	1	1	6	1	1	12.1333	1	1
74	28.6924	2	0	0	1	0	0	2	1	1	2	1	1	6.51	1	1	28.8667	1	2
58	20.5129	2	0	0	0	0	0	2	1	1	2	1	1		1	2	52.8	1	1
68	21.2877	1	1	0	0	0	0	2	2	1	2	1	2	5.44	1	1	19.1	1	1
68	18.7313	2	0	0	0	0	0	2	1	1	2	1	1	4.09	1	1	33.8	1	1
63	24.5848	2	1	0	1	0	0	2	1	1	1	2	1		0	1	30.6	1	1
60	24.0345	1	1	0	0	0	0	2	1	1	2	1	1	6.04	1	1	26.7667	1	1
53	25.9315	2	0	0	0	0	0	2	1	1	2	2	1	6.92	1	1	13.3333	1	2
63	18.341	2	0	0	0	0	0	2	1	1	1	1	3	11.76	1	1	10.8333	1	2
54	26.9476	1	0	0	0	1	0	1	1	1		2	1	10.21	1	1	48.8667	1	2
63	22.3177	1	0	0	0	1	1	1	1	2	1	2	1	4.4	1	1	5.63333	1	1
62	24.0345	1	1	0	0	0	0	2	1	2	2	2	1	5.69	1	1	33.7	1	1
60	20.601	1	1	0	0	1	1	1	2	2		1	2		1	1	5.63333	1	1
63	30.4383	2	0	0	1	1	0	1	1	1	2	1	1	17.3	0	1	11.4	1	2
62	23.4141	2	0	0	1	1	0	1	1	1	2	1	1	6.45	0	2	57.3667	1	2
63	27.468	1	0	0	0	0	0	2	1	1	2	1	1	4.99	1	1	4.43333	1	1
73	23.9104	2	0	0	0	0	0	2	2	1	2	2	2		0	1	9.83333	1	1
53	21.287	2	0	0	0	0	0	2	1	1	2	1	3	4.93	1	1	16.3	1	1
65	26.536	2	0	0	1	1	0	1	1	2	2	1	1	8.5	1	1	7.46667	1	2
72	23.1133	2	0	0	0	0	0	2	1	1		1	1	6.61	1	1	9.36667	1	2
70	24.4351	1	0	0	0	0	0	2	1	1	2	2	1	5.73	1	1	11.6667	1	1
60	20.601	1	1	0	1	0	0	2		2	1	2	3	4.81	1	1	9.1	1	1
60	21.9744	1	1	0	0	0	0	2	1	1	2	1	3	6.53	1	2	55.0667	1	2
76	17.2078	1	0	0	1	0	0	2	1	1	2	1	1	4.72	0	1	12.9	1	1
40	20.213	1	0	0	1	0	0	2	1	1	2	1	1	15.92	1	1	45.0667	1	2
60	19.9143	1	0	0	0	1	0	1	1	2		1	1	5.51	0	1	42.0667	1	1
45	15.4966	1	1	0	0	0	0	2	1	1	2	1	1	4.71	0	1	29.5667	1	1
70	26.8992	2	0	0	0	0	0	2	1	1	2	1	1	5.91	1	2	54.3	1	1
76	23.7467	1	1	0	0	1	0	1	2	1	2	1	2	7.79	0	1	10.3	1	2
44	26.9348	2	0	0	0	0	0	2	1	1	2	1	1	4.45	1	1	3.03333	1	1
64	22.3177	1	0	0	0	0	0	2	1	1	1	2	1	7.61	0	1	11.6333	1	2
45	19.4315	2	1	0	1	1	0	1	1	1	2	1	1	6.84	1	1	12.8333	1	2
58	19.7389	2	0	0	1	0	0	2	1	1	2	1	1	5.73	1	2	52.0333	1	1
62	23.976	2	0	0	0	1	0	1	1	1	2	1	3		0	1	1.2	1	1
80	20.8691	1	0	0	0	0	0	2	1	1	1	2	1	5.81	1	1	5.36667	1	1
63	15.2192	2	1	0	0	0	0	2	2	2	2	1	2		0	1	4.46667	1	1
47	28.8587	2	0	0	0	0	0	2	1	1	2	1	1	9.72	1	2	52.0333	1	2
53	24.5896	1	1	1	0	1	0	1	2	1	2	2	2	5.16	0	1	25.8333	1	1
52	19.3518	2	0	0	0	0	0	2	1	2	2	2	1	5.48	1	2	51.5667	1	1
50	21.8949	1	1	1	0	1	0	1	1	2	2	1	1	5.17	0	1	13.6333	1	1
76	23.9294	1	0	0	0	0	0	2	2	2	2	1	2	5.54	0	1	30.0667	1	1
67	18.8633	2	1	1	1	0	0	2	1	1	2	1	1	4.26	0	2	46.2	1	1
63	23.5791	1	0	0	0	0	0	2	2	1	1	1	2	6.62	1	1	11.1667	1	2
65	24.0844	1	1	1	0	0	0	2	1	2	2	1	1	8.53	1	2	44.4	1	2
61	23.9294	1	0	0	0	0	0	2	1	1		1	1	5.35	1	1	11.7667	1	1
66	20.5475	2	0	0	0	0	0	2	1	1	2	1	1	5.21	1	2	44.1333	1	1
73	23.8971	2	0	0	0	1	0	1	2	1	2	1	2	12.82	0	2	43.4333	1	2
57	19.9143	1	1	1	0	0	0	2	2	1	2	1	2	4.65	0	2	42.7	1	1
64	23.8971	2	0	0	1	1	0	1	1	1	2	1	1	7.34	0	1	23.0667	1	2
62	23.8971	2	0	0	0	0	0	2	1	1	2	1	1	7.58	1	1	11.5	1	2
71	21.2877	1	1	0	0	0	0	2	2	1		1	2	4.07	0	2	42.4667	1	1
44	19.0559	1	1	1	0	0	0	2	1	2	2	1	1	12.16	1	1	18.7	1	2
72	21.2877	1	1	0	0	0	0	2	1	1	2	1	1	5.65	0	1	0.666667	1	1
54	21.2877	2	0	0	1	1	0	1	2	1	2	1	2	7.86	1	1	15.3333	1	2
53	25.4079	1	0	0	0	0	0	2	1	1	2	1	1	5.48	0	1	23.5667	1	1
62	23.8971	1	0	1	1	1	0	1	1	2	2	1	1	5.42	1	1	0.6	1	1
50	23.4232	1	1	0	0	0	0	2	1	2	2	1	1	5.14	1	1	20.0333	1	1
52	23.4232	1	0	0	0	0	0	2	1	1	1	1	1	4.81	1	1	4.66667	1	1
56	20.9935	2	0	0	0	0	0	2	2	1	2	1	2	5.78	1	1	16.4	1	1
59	23.4232	1	0	1	0	1	0	1	2	1	2	1	2	10.72	1	1	3.83333	1	2
50	26.9348	1	1	0	1	0	0	2	1	1	2	1	1	6.29	1	2	47.8	1	2
65	21.1604	1	1	1	1	1	0	1	1	1	2	1	3	13.96	1	1	23.1	1	2
58	23.9963	2	1	1	1	1	1	1	1	1	1	2	1	11.29	1	1	2.76667	1	2
51	23.9963	2	0	0	1	0	0	2	2	1	2	2	2	4.68	0	2	46.8333	1	1
51	23.9963	2	1	0	0	0	0	2	1	1	1	2	1	6.51	1	2	46.4333	1	2
45	23.9963	1	0	0	0	0	0	2	1	1	2	2	2	5.39	1	1	10.3	1	1
65	23.9963	1	1	1	1	1	0	1	1	2	2	2	1	5.55	0	1	3.36667	1	1
59	26.3185	1	1	1	1	1	0	1	2	1	2	2	2	8.4	0	1	16.8	1	2
55	23.9963	2	0	0	0	0	0	2	2	1	2	2	2	5.29	0	1	13.1667	1	1
63	27.0926	2	0	0	1	0	0	2	1	1	2	2	1	11.57	1	1	16.1333	1	2
55	19.7389	2	0	0	0	0	0	2	1	2	1	2	1	5.11	0	2	41.9667	1	1
78	23.9963	2	0	0	1	0	0	2	2	1	2	2	2	6.16	1	2	41.9	1	2
59	20.1259	2	0	0	0	0	0	2	1	1	2	2	1	7.56	1	1	13.5333	1	2
73	25.7555	1	1	0	0	1	0	1	2	2	1	2	2	4.97	1	1	14.7667	1	1
54	30.2432	1	1	1	0	1	0	1	1	1		2	1	13.67	0	1	1.96667	1	2
62	24.975	2	0	0	0	0	0	2	1	1	2	2	1		1	2	40.5667	1	1
63	23.976	2	0	0	1	0	0	2	1	1	2	2	1	5.72	1	1	20.7	1	1
52	22.6336	2	0	0	0	0	0	2	1	1	2	2	1	6.26	1	1	14.5333	1	2
61	25.7555	1	0	0	0	0	0	2	1	1	1	2	1	6.4	1	1	5.36667	1	2
48	21.4629	2	0	0	0	0	0	2	1	1	1	2	1	5.21	1	1	4.53333	1	1
63	19.902	2	0	0	1	0	0	2	2	1		2	2	7.84	1	2	39.6	1	2
57	23.976	1	0	1	0	0	0	2	1	1	2	2	1	5.91	1	2	39.2667	1	1
66	23.9104	2	0	0	1	0	0	2	1	2	1	2	1	5.79	0	1	7	1	1
53	27.4969	1	1	0	0	0	0	2	1	1	2	2	1	6.67	1	1	19.8667	1	2
